# Supplementary material
Source: PubMed Central journal article supplement (PMC6990703)
Supplement: jamapsychiatry-77-484-s003.pdf [file jamapsychiatry-77-484-s003.pdf]

## **Data Sharing Statement**

Felder. Efficacy of Digital Cognitive Behavioral Therapy for the Treatment of Insomnia Symptoms Among Pregnant Women. *JAMA Psychiatry*. Published January 22, 2020.  
10.1001/jamapsychiatry.2019.4491

### **Data**

**Data available:** No

### **Additional Information**

**Explanation for why data not available:** Available upon request.
